# Supplementary material for: Bioinformatic Comparison of Bacterial Secretomes
Source: PubMed Central journal article supplement — Genomics Proteomics Bioinformatics. 2009 Jul 8;7(1-2):37–46. doi: 10.1016/S1672-0229(08)60031-5 (PMC5054224; doi:10.1016/s1672-0229(08)60031-5), 2009-07-08
Supplement: mmc1.pdf [file mmc1.pdf]

## Supporting Online Material

Song, C., et al. 2009. Bioinformatic comparison of bacterial secretomes. *Genomics Proteomics Bioinformatics* 7: 37-46.  
DOI: 10.1016/S1672-0229(08)60031-5

**Table S1** Predicted secretomes

| <b>Bacterium</b>                                                  | <b>Proteome<br/>(# of ORFs)</b> | <b>Secretome</b> | <b>% of Proteome</b> | <b>Accession #</b> | <b>Reference</b> |
|-------------------------------------------------------------------|---------------------------------|------------------|----------------------|--------------------|------------------|
| <b>Gram negative</b>                                              |                                 |                  |                      |                    |                  |
| <i>Acinetobacter</i> sp. ADP1*                                    | 3325                            | 869              | 26.1                 | NC_005966          | 1                |
| <i>Agrobacterium tumefaciens</i> str. C58<br>chromosome circular* | 2715                            | 754              | 27.8                 | NC_003062          | 2                |
| <i>Anabaena variabilis</i> ATCC 29413                             | 5039                            | 1177             | 23.4                 | NC_007413          | 3                |
| <i>Anaplasma marginale</i> str. St. Maries*                       | 949                             | 277              | 29.2                 | NC_004842          | 4                |
| <i>Aquifex aeolicus</i> VF5                                       | 1529                            | 319              | 20.9                 | NC_000918          | 5                |
| <i>Azoarcus</i> sp.                                               | 4133                            | 1198             | 29.0                 | NC_006513          | 6                |
| <i>Bacillus clausii</i> KSM-K16                                   | 4096                            | 970              | 23.7                 | NC_006582          | 7                |
| <i>Bacteroides fragilis</i> NCTC 9343*                            | 4184                            | 1504             | 35.9                 | NC_003228          | 8                |
| <i>Bacteroides thetaiotaomicron</i> VPI-5482                      | 4778                            | 1797             | 37.6                 | NC_004663          | 9                |
| <i>Bartonella henselae</i> str. Houston-1*                        | 1488                            | 371              | 24.9                 | NC_005956          | 10               |
| <i>Bartonella quintana</i> str. Toulouse*                         | 1142                            | 287              | 25.1                 | NC_005955          | 10               |
| <i>Bdellovibrio bacteriovorus</i> HD 100                          | 3587                            | 1520             | 42.4                 | NC_005363          | 11               |
| <i>Bordetella bronchiseptica</i> RB 50*                           | 4994                            | 1807             | 36.2                 | NC_002927          | 12               |
| <i>Bordetella parapertussis</i> 12822*                            | 4185                            | 1506             | 36.0                 | NC_002928          | 12               |
| <i>Borrelia burgdorferi</i> B31*                                  | 851                             | 199              | 23.4                 | NC_001318          | 13               |
| <i>Borrelia garini</i> PBii*                                      | 832                             | 192              | 23.1                 | NC_006156          | 14               |
| <i>Bradyrhizobium japonicum</i> USDA 110                          | 8317                            | 2577             | 31.0                 | NC_004463          | 15               |
| <i>Brucella abortus</i> biovar 1 str. 9-941<br>chromosome I*      | 2030                            | 551              | 27.1                 | NC_006932          | 16               |
| <i>Brucella melitensis</i> 16M chromosome I*                      | 2059                            | 489              | 23.7                 | NC_003317          | 17               |
| <i>Brucella suis</i> 1330*                                        | 2123                            | 583              | 27.5                 | NC_004310          | 17               |
| <i>Buchnera aphidicola</i> str. APS                               | 564                             | 71               | 12.6                 |                    |                  |

|                                                                            |      |      |      |           |    |
|----------------------------------------------------------------------------|------|------|------|-----------|----|
| (Acyrtosiphon pisum)                                                       |      |      |      | NC_002528 | 18 |
| <i>Burkholderia mallei</i> ATCC 23344<br>chromosome 1*                     | 2996 | 1017 | 33.9 | NC_006348 | 19 |
| <i>Burkholderia pseudomallei</i> 1710b<br>chromosome I*                    | 3736 | 1150 | 30.8 | NC_007434 | 20 |
| <i>Burkholderia</i> sp. 383*                                               | 1209 | 398  | 32.9 | NC_007509 | 21 |
| <i>Campylobacter jejuni</i> RM1221*                                        | 1838 | 437  | 23.8 | NC_003912 | 22 |
| <i>Caulobacter crescentus</i> CB15                                         | 3737 | 1196 | 32.0 | NC_002696 | 23 |
| <i>Chlamydia muridarum</i> Nigg*                                           | 904  | 255  | 28.2 | NC_002620 | 24 |
| <i>Chlamydia trachomatis</i> A/HAR-13*                                     | 911  | 259  | 28.4 | NC_007429 | 25 |
| <i>Chlamydophila abortus</i> S26/3*                                        | 932  | 253  | 27.1 | NC_004552 | 26 |
| <i>Chlamydophila caviae</i> GPIC*                                          | 998  | 272  | 27.3 | NC_003361 | 27 |
| <i>Chlamydophila pneumoniae</i> AR39*                                      | 1112 | 294  | 26.4 | NC_002179 | 24 |
| <i>Chlorobium tepidum</i> TLS                                              | 2252 | 519  | 23.0 | NC_002932 | 28 |
| <i>Chromobacterium violaceum</i> ATCC 12472                                | 4407 | 1461 | 33.2 | NC_005085 | 29 |
| <i>Coxiella burnetii</i> RSA 493*                                          | 2016 | 435  | 21.6 | NC_002971 | 30 |
| <i>Dechloromonas aromatica</i> RCB                                         | 4171 | 1449 | 34.7 | NC_007298 | 31 |
| <i>Dehalococcoides ethenogenes</i> 195                                     | 1580 | 332  | 21.0 | NC_002936 | 32 |
| <i>Desulfotalea psychrophila</i> LSv54                                     | 3116 | 823  | 26.4 | NC_006138 | 33 |
| <i>Desulfovibrio vulgaris</i> subsp. <i>vulgaris</i> str.<br>Hildenborough | 3379 | 915  | 27.1 | NC_002937 | 34 |
| <i>Ehrlichia canis</i> str. Jake*                                          | 925  | 243  | 26.3 | NC_007354 | 35 |
| <i>Ehrlichia ruminantium</i> str. Gardel*                                  | 950  | 227  | 23.9 | NC_006831 | 36 |
| <i>Erwinia carotovora</i> subsp. <i>atroseptica</i><br>SCRI1043*           | 4472 | 1339 | 29.9 | NC_004547 | 37 |
| <i>Escherichia coli</i> CFT073*                                            | 5379 | 1468 | 27.3 | NC_004431 | 38 |
| <i>Francisella tularensis</i> subsp. <i>tularensis</i><br>SCHU S4*         | 1603 | 420  | 26.2 | NC_006570 | 39 |
| <i>Fusobacterium nucleatum</i> subsp. <i>nucleatum</i><br>ATCC 25586       | 2067 | 361  | 17.5 | NC_003454 | 40 |
| <i>Geobacter sulfurreducens</i> PCA                                        | 3446 | 1047 | 30.4 | NC_002939 | 41 |

|                                                                           |      |      |      |           |    |
|---------------------------------------------------------------------------|------|------|------|-----------|----|
| <i>Gloeobacter violaceus</i> PCC 7421                                     | 4430 | 1267 | 28.6 | NC_005125 | 42 |
| <i>Gluconobacter oxydans</i> 621H                                         | 2432 | 730  | 30.0 | NC_006677 | 43 |
| <i>Haemophilus ducreyi</i> 35000HP*                                       | 1717 | 460  | 26.8 | NC_002940 | 44 |
| <i>Haemophilus influenzae</i> 86-028NP*                                   | 1791 | 451  | 25.2 | NC_007146 | 45 |
| <i>Helicobacter hepaticus</i> ATCC 51449*                                 | 1875 | 454  | 24.2 | NC_004917 | 46 |
| <i>Helicobacter pylori</i> 26695*                                         | 1576 | 444  | 28.2 | NC_000915 | 47 |
| <i>Idiomarina loihiensis</i> L2TR                                         | 2628 | 843  | 32.1 | NC_006512 | 48 |
| <i>Legionella pneumophila</i> str. Lens*                                  | 2878 | 772  | 26.8 | NC_006369 | 49 |
| <i>Leptospira interrogans</i> serovar<br>Copenhageni str. Fiocruz L1-130* | 3394 | 796  | 23.5 | NC_005823 | 50 |
| <i>Mannheimia succiniciproducens</i> MBEL55E                              | 2380 | 603  | 25.3 | NC_006300 | 51 |
| <i>Mesorhizobium loti</i> MAFF303099                                      | 6743 | 1911 | 28.3 | NC_002678 | 3  |
| <i>Neisseria gonorrhoeae</i> FA 1090*                                     | 2002 | 530  | 26.5 | NC_002946 | 52 |
| <i>Neisseria meningitidis</i> Z2491*                                      | 2065 | 550  | 26.6 | NC_003116 | 53 |
| <i>Nitrobacter winogradskyi</i> Nb-255                                    | 3122 | 881  | 28.2 | NC_007406 | 54 |
| <i>Nitrosomonas europaea</i> ATCC 19718                                   | 2461 | 638  | 25.9 | NC_004757 | 55 |
| <i>Nostoc</i> sp. PCC 7120                                                | 5366 | 1219 | 22.7 | NC_003272 | 56 |
| <i>Oceanobacillus iheyensis</i> HTE831                                    | 3500 | 752  | 21.5 | NC_004193 | 57 |
| <i>Pasteurella multocida</i> subsp. multocida str.<br>Pm70*               | 2015 | 595  | 29.5 | NC_002663 | 58 |
| <i>Pelobacter carbinolicus</i> DSM 2380                                   | 3118 | 803  | 25.8 | NC_007498 | 59 |
| <i>Pelodictyon luteolum</i> DSM 273                                       | 2083 | 541  | 26.0 | NC_007512 | 60 |
| <i>Photobacterium profundum</i> SS9<br>chromosome 1                       | 3416 | 941  | 27.5 | NC_006370 | 61 |
| <i>Pirellula</i> sp.                                                      | 7325 | 2043 | 27.9 | NC_005027 | 15 |
| <i>Porphyromonas gingivalis</i> W83*                                      | 1909 | 509  | 26.7 | NC_002950 | 62 |
| <i>Prochlorococcus marinus</i> str. MIT 9313                              | 2265 | 614  | 27.1 | NC_005071 | 63 |
| <i>Pseudoalteromonas haloplanktis</i> TAC125<br>chromosome I              | 2940 | 942  | 32.0 | NC_007481 | 64 |
| <i>Pseudomonas aeruginosa</i> PAO1*                                       | 5567 | 1979 | 35.5 | NC_002516 | 65 |
| <i>Pseudomonas fluorescens</i> Pf-5                                       | 6137 | 2089 | 34.0 | NC_004129 | 66 |

|                                                                                 |      |      |      |           |    |
|---------------------------------------------------------------------------------|------|------|------|-----------|----|
| <i>Pseudomonas putida</i> KT2440                                                | 5350 | 1744 | 32.6 | NC_002947 | 67 |
| <i>Ralstonia eutropha</i> JMP134 chromosome 1                                   | 3439 | 1119 | 32.5 | NC_007347 | 68 |
| <i>Ralstonia solanacearum</i> *                                                 | 3440 | 1166 | 33.9 | NC_003295 | 69 |
| <i>Rhodobacter sphaeroides</i> 2.4.1<br>chromosome 1                            | 3022 | 932  | 30.8 | NC_007493 | 70 |
| <i>Rhodopirellula baltica</i> SH 1                                              | 7325 | 2043 | 27.9 | NC_005027 | 15 |
| <i>Rhodopseudomonas palustris</i> CGA009                                        | 4813 | 1576 | 32.7 | NC_005296 | 71 |
| <i>Rickettsia conorii</i> str. Malish 7*                                        | 1374 | 258  | 18.8 | NC_003103 | 72 |
| <i>Rickettsia felis</i> URRWXC2*                                                | 1400 | 244  | 17.4 | NC_007109 | 73 |
| <i>Rickettsia prowazekii</i> str. Madrid Ei*                                    | 835  | 176  | 21.1 | NC_000963 | 74 |
| <i>Rickettsia typhi</i> str. Wilmingtoni*                                       | 838  | 172  | 20.5 | NC_006142 | 75 |
| <i>Salmonella enterica</i> subsp. <i>enterica</i> serovar<br>Choleraesuis str.* | 4441 | 1314 | 29.6 | NC_006905 | 76 |
| <i>Salmonella typhimurium</i> LT2*                                              | 4425 | 1358 | 30.7 | NC_003197 | 77 |
| <i>Shewanella oneidensis</i> MR-1                                               | 4324 | 1393 | 32.2 | NC_004347 | 78 |
| <i>Shigella flexneri</i> 2a str. 2457T*                                         | 4068 | 1052 | 25.9 | NC_004741 | 79 |
| <i>Shigella sonnei</i> Ss046*                                                   | 4223 | 1086 | 25.7 | NC_007384 | 80 |
| <i>Silicibacter pomeroyi</i> DSS-3                                              | 3810 | 1155 | 30.3 | NC_003911 | 81 |
| <i>Sinorhizobium meliloti</i> 1021                                              | 3341 | 1021 | 30.6 | NC_003047 | 82 |
| <i>Symbiobacterium thermophilum</i> IAM 14863                                   | 3337 | 901  | 27.0 | NC_006177 | 83 |
| <i>Synechococcus</i> sp. CC9605                                                 | 2638 | 688  | 26.1 | NC_007516 | 84 |
| <i>Synechocystis</i> sp. PCC 6803                                               | 3167 | 783  | 24.7 | NC_000911 | 85 |
| <i>Thermoanaerobacter tengcongensis</i> MB4                                     | 2588 | 524  | 20.2 | NC_003869 | 86 |
| <i>Thermotoga maritima</i> MSB8                                                 | 1858 | 421  | 22.7 | NC_000853 | 87 |
| <i>Thermus thermophilus</i> HB8                                                 | 1973 | 620  | 31.4 | NC_006461 | 88 |
| <i>Thiobacillus denitrificans</i> ATCC 25259                                    | 2827 | 1019 | 36.0 | NC_007404 | 89 |
| <i>Thiomicrospira crunogena</i> XCL-2                                           | 2192 | 597  | 27.2 | NC_007520 | 90 |
| <i>Thiomicrospira denitrificans</i> ATCC 33889                                  | 2097 | 556  | 26.5 | NC_007575 | 91 |
| <i>Treponema denticola</i> ATCC 35405*                                          | 2767 | 772  | 27.9 | NC_002967 | 92 |
| <i>Treponema pallidum</i> subsp. <i>pallidum</i> str.<br>Nichols*               | 1036 | 348  | 33.6 | NC_000919 | 93 |

|                                                                               |      |      |      |           |     |
|-------------------------------------------------------------------------------|------|------|------|-----------|-----|
| <i>Ureaplasma parvum</i> serovar 3 str. ATCC 700970*                          | 614  | 119  | 19.4 | NC_002162 | 94  |
| <i>Vibrio cholerae</i> O1 biovar eltor str. N16961 chromosome I*              | 2742 | 799  | 29.1 | NC_002505 | 95  |
| <i>Vibrio fischeri</i> ES114 chromosome I                                     | 2575 | 756  | 29.4 | NC_006840 | 96  |
| <i>Vibrio parahaemolyticus</i> RIMD 2210633 chromosome I*                     | 3080 | 904  | 29.4 | NC_004603 | 97  |
| <i>Vibrio vulnificus</i> YJ016 chromosome I*                                  | 3259 | 944  | 29.0 | NC_005139 | 98  |
| <i>Wigglesworthia glossinidia</i> endosymbiont of <i>Glossina brevipalpis</i> | 611  | 79   | 12.9 | NC_004344 | 99  |
| <i>Wolbachia</i> endosymbiont of <i>Drosophila melanogaster</i>               | 1195 | 215  | 18.0 | NC_002978 | 100 |
| <i>Wolinella succinogenes</i> DSM 1740                                        | 2043 | 592  | 29.0 | NC_005090 | 101 |
| <i>Xanthomonas axonopodis</i> pv. citri str. 306*                             | 4312 | 1606 | 37.2 | NC_003919 | 102 |
| <i>Xanthomonas campestris</i> pv. campestris str. 8004*                       | 4273 | 1589 | 37.2 | NC_007086 | 103 |
| <i>Xanthomonas oryzae</i> pv. oryzae KACC10331*                               | 4080 | 1254 | 30.7 | NC_006834 | 104 |
| <i>Xylella fastidiosa</i> 9a5c*                                               | 2766 | 742  | 26.8 | NC_002488 | 105 |
| <i>Yersinia pestis</i> CO92*                                                  | 3885 | 1146 | 29.5 | NC_003143 | 106 |
| <i>Yersinia pseudotuberculosis</i> IP 32953*                                  | 3901 | 1150 | 29.5 | NC_006155 | 107 |
| <i>Zymomonas mobilis</i> subsp. mobilis ZM4                                   | 1998 | 515  | 25.8 | NC_006526 | 108 |

### Gram positive

|                                                    |      |     |      |           |     |
|----------------------------------------------------|------|-----|------|-----------|-----|
| <i>Bacillus anthracis</i> Str. Ames*               | 5311 | 936 | 17.6 | NC_003997 | 109 |
| <i>Bacillus cereus</i> ATCC 14579*                 | 5234 | 914 | 17.5 | NC_004722 | 110 |
| <i>Bacillus halodurans</i> C-125                   | 4066 | 580 | 14.3 | NC_002570 | 111 |
| <i>Bacillus licheniformis</i> ATCC 14580           | 4196 | 745 | 17.8 | NC_006322 | 112 |
| <i>Bacillus subtilis</i> subsp. subtilis str. 168* | 4112 | 737 | 17.9 | NC_000964 | 113 |
| <i>Bacillus thuringiensis</i> serovar konkukian    | 5117 | 865 | 16.9 | NC_005957 |     |

|                                                          |      |      |      |           |     |
|----------------------------------------------------------|------|------|------|-----------|-----|
| str. 97-27*                                              |      |      |      |           | 114 |
| <i>Bifidobacterium longum</i> NCC2705                    | 1727 | 364  | 21.1 | NC_004307 | 115 |
| Candidatus <i>Blochmannia floridanus</i>                 | 583  | 80   | 13.7 | NC_005061 | 116 |
| Candidatus <i>Pelagibacter ubique</i> HTCC1062           | 1354 | 431  | 31.8 | NC_007205 | 117 |
| <i>Carboxydotherrmus hydrogenoformans</i> Z-2901         | 2620 | 383  | 14.6 | NC_007503 | 118 |
| <i>Clostridium acetobutylicum</i> ATCC 824               | 3672 | 878  | 23.9 | NC_003030 | 119 |
| <i>Clostridium perfringens</i> *                         | 2660 | 442  | 16.6 | NC_003366 | 120 |
| <i>Clostridium tetani</i> E88*                           | 2373 | 445  | 18.8 | NC_004557 | 121 |
| <i>Cohwellia psychrerythraea</i> 34H                     | 4910 | 1237 | 25.2 | NC_003910 | 122 |
| <i>Corynebacterium diphtheriae</i> NCTC 13129*           | 2272 | 466  | 20.5 | NC_002935 | 123 |
| <i>Corynebacterium efficiens</i> YS-314                  | 2950 | 574  | 19.5 | NC_004369 | 124 |
| <i>Corynebacterium glutamicum</i> ATCC 13032             | 2993 | 519  | 17.3 | NC_003450 | 125 |
| <i>Corynebacterium jeikeium</i> K411*                    | 2137 | 478  | 22.4 | NC_007164 | 126 |
| <i>Dehalococcoides</i> sp. CBDB1                         | 1458 | 254  | 17.4 | NC_007356 | 127 |
| <i>Deinococcus radiodurans</i> R1                        | 2629 | 649  | 24.7 | NC_001263 | 128 |
| <i>Enterococcus faecalis</i> V583*                       | 3113 | 620  | 19.9 | NC_004668 | 129 |
| <i>Geobacillus kaustophilus</i> HTA426                   | 3498 | 497  | 14.2 | NC_006510 | 130 |
| <i>Lactobacillus acidophilus</i> NCFM                    | 1864 | 497  | 26.7 | NC_006814 | 131 |
| <i>Lactobacillus johnsonii</i> NCC 533                   | 1821 | 433  | 23.8 | NC_005362 | 132 |
| <i>Lactobacillus plantarum</i> WCFS1                     | 3009 | 704  | 23.4 | NC_004567 | 133 |
| <i>Lactococcus lactis</i> subsp. cremoris SK11           | 2321 | 453  | 19.5 | NC_008527 | 134 |
| <i>Leifsonia xyli</i> subsp. xyli str. CTCB07*           | 2030 | 421  | 20.7 | NC_006087 | 135 |
| <i>Listeria innocua</i> Clip11262                        | 2968 | 534  | 18.0 | NC_003212 | 136 |
| <i>Listeria monocytogenes</i> str. 4b F2365*             | 2821 | 491  | 17.4 | NC_002973 | 137 |
| <i>Mesoplasma florum</i> L1                              | 682  | 127  | 18.6 | NC_006055 | 138 |
| <i>Methylococcus capsulatus</i> str. Bath                | 2960 | 567  | 19.2 | NC_002977 | 139 |
| <i>Mycobacterium avium</i> subsp. paratuberculosis K-10* | 4350 | 849  | 19.5 | NC_002944 | 140 |
| <i>Mycobacterium bovis</i> AF2122/97*                    | 3920 | 888  | 22.7 | NC_002945 | 141 |

|                                                                   |      |      |      |           |     |
|-------------------------------------------------------------------|------|------|------|-----------|-----|
| <i>Mycobacterium leprae</i> TN*                                   | 1605 | 328  | 20.4 | NC_002677 | 142 |
| <i>Mycobacterium tuberculosis</i> CDC1551*                        | 4189 | 1010 | 24.1 | NC_002755 | 143 |
| <i>Mycoplasma gallisepticum</i> R*                                | 726  | 242  | 33.3 | NC_004829 | 144 |
| <i>Mycoplasma genitalium</i> *                                    | 484  | 142  | 29.3 | NC_000908 | 145 |
| <i>Mycoplasma hyopneumoniae</i> 232*                              | 691  | 192  | 27.8 | NC_006360 | 146 |
| <i>Mycoplasma mobile</i> 163K*                                    | 633  | 131  | 20.7 | NC_006908 | 147 |
| <i>Mycoplasma mycoides</i> subsp. <i>mycoides</i> SC str. PG1*    | 1016 | 366  | 36.0 | NC_005364 | 148 |
| <i>Mycoplasma penetrans</i> HF-2*                                 | 1037 | 387  | 37.3 | NC_004432 | 149 |
| <i>Mycoplasma pneumoniae</i> *                                    | 689  | 252  | 36.6 | NC_000912 | 150 |
| <i>Mycoplasma pulmonis</i> *                                      | 782  | 216  | 27.6 | NC_002771 | 151 |
| <i>Mycoplasma synoviae</i> 53*                                    | 672  | 291  | 43.3 | NC_007294 | 152 |
| <i>Nitrosococcus oceani</i> ATCC 19707                            | 2974 | 491  | 16.5 | NC_007484 | 153 |
| <i>Propionibacterium acnes</i> KPA171202                          | 2297 | 488  | 21.2 | NC_006085 | 154 |
| <i>Psychrobacter arcticus</i> 273-4                               | 2120 | 428  | 20.2 | NC_007204 | 155 |
| <i>Staphylococcus aureus</i> subsp. <i>aureus</i> MW2*            | 2632 | 509  | 19.3 | NC_003923 | 156 |
| <i>Staphylococcus epidermidis</i> ATCC 12228                      | 2419 | 442  | 18.3 | NC_004461 | 157 |
| <i>Staphylococcus haemolyticus</i> JCSC1435                       | 2676 | 525  | 19.6 | NC_007168 | 158 |
| <i>Staphylococcus saprophyticus</i> subsp. <i>saprophyticus</i> * | 2446 | 389  | 15.9 | NC_007350 | 159 |
| <i>Streptococcus agalactiae</i> 2603V/R*                          | 2124 | 440  | 20.7 | NC_004116 | 160 |
| <i>Streptococcus mutans</i> UA159                                 | 1960 | 366  | 18.7 | NC_004350 | 161 |
| <i>Streptococcus pneumoniae</i> R6*                               | 2043 | 368  | 18.0 | NC_003098 | 162 |
| <i>Streptococcus pyogenes</i> M1 GAS*                             | 1697 | 337  | 19.9 | NC_002737 | 163 |
| <i>Streptococcus thermophilus</i> CNRZ1066                        | 1915 | 441  | 23.0 | NC_006449 | 164 |
| <i>Streptomyces avermitilis</i> MA-4680                           | 7575 | 1899 | 25.1 | NC_003155 | 165 |
| <i>Streptomyces coelicolor</i> A3(2)                              | 7769 | 1914 | 24.6 | NC_003888 | 166 |
| <i>Thermobifida fusca</i> YX                                      | 3110 | 552  | 17.7 | NC_007333 | 167 |
| <i>Thermosynechococcus elongatus</i> BP-1                         | 2475 | 361  | 14.6 | NC_004113 | 168 |
| <i>Tropheryma whipplei</i> TW08/27*                               | 783  | 168  | 21.5 | NC_004551 | 169 |

\* Considered pathogenic to generate the data for Figure 3.



## References

1. Barbe, V., *et al.* 2004. Unique features revealed by the genome sequence of *Acinetobacter* sp. ADP1, a versatile and naturally transformation competent bacterium. *Nucleic Acids Res.* 32: 5766-5779.
2. Goodner, B., *et al.* 2001. Genome sequence of the plant pathogen and biotechnology agent *Agrobacterium tumefaciens* C58. *Science.* 294: 2323-2328.
3. Kaneko, T., *et al.* 2001. Complete genomic sequence of the filamentous nitrogen-fixing cyanobacterium *Anabaena* sp. strain PCC 7120. *DNA Res.* 8: 205-213.
4. Brayton, K.A., *et al.* 2005. Complete genome sequencing of *Anaplasma marginale* reveals that the surface is skewed to two superfamilies of outer membrane proteins. *Proc. Natl. Acad. Sci. USA.* 102: 844-849.
5. Deckert, G., *et al.* 1998. The complete genome of the hyperthermophilic bacterium *Aquifex aeolicus*. *Nature* 392: 353-358.
6. Rabus, R., *et al.* 2005. The genome sequence of an anaerobic aromatic-degrading denitrifying bacterium, strain EbN1. *Arch. Microbiol.* 183: 27-36.
7. Takaki, Y., *et al.* 2005. The complete genome sequence of the alkaliphilic *Bacillus clausii* KSM-K16. Direct Submission, National Centre for Biotechnology Information (NCBI).
8. Cerdeno-Tarraga, A.M., *et al.* 2005. Extensive DNA inversions in the *B. fragilis* genome control variable gene expression. *Science* 307: 1463-1465.
9. Xu, J., *et al.* 2003. A genomic view of the human-*Bacteroides thetaiotaomicron* symbiosis. *Science* 299: 2074-2076.
10. Alsmark, C.M., *et al.* 2004. The louse-borne human pathogen *Bartonella quintana*

- is a genomic derivative of the zoonotic agent *Bartonella henselae*. *Proc. Natl. Acad. Sci. USA*. 101: 9716-9721.
11. Rendulic, S., *et al.* 2004. A predator unmasked: life cycle of *Bdellovibrio bacteriovorus* from a genomic perspective. *Science* 303: 689-692.
  12. Parkhill, J., *et al.* 2003. Comparative analysis of the genome sequences of *Bordetella pertussis*, *Bordetella parapertussis* and *Bordetella bronchiseptica*. *Nat. Genet.* 35: 32-40.
  13. Fraser, C.M., *et al.* 1997. Genomic sequence of a Lyme disease spirochaete, *Borrelia burgdorferi*. *Nature*. 390: 580-586.
  14. Glockner, G., *et al.* 2004. Comparative analysis of the *Borrelia garinii* genome. *Nucleic Acids Res.* 32: 6038-6046.
  15. Kaneko, T., *et al.* 2002. Complete genomic sequence of nitrogen-fixing symbiotic bacterium *Bradyrhizobium japonicum* USDA110. *DNA Res.* 9: 189-197.
  16. Halling, S.M., *et al.* 2005. Completion of the genome sequence of *Brucella abortus* and comparison to the highly similar genomes of *Brucella melitensis* and *Brucella suis*. *J. Bacteriol* 187: 2715-2726.
  17. Paulsen, I.T., *et al.* 2002. The *Brucella suis* genome reveals fundamental similarities between animal and plant pathogens and symbionts. *Proc. Natl. Acad. Sci. USA*. 99: 13148-13153.
  18. Shigenobu, S., *et al.* 2000. Genome sequence of the endocellular bacterial symbiont of aphids *Buchnera* sp. APS. *Nature* 407: 81-86.
  19. Nierman, W.C., *et al.* 2004. From the cover: structural flexibility in the *Burkholderia mallei* genome. *Proc. Natl. Acad. Sci. USA*. 101: 14246-14251.

20. Woods, D.E. and Nierman, W.C. 2005. Direct Submission, National Centre for Biotechnology Information (NCBI).
21. Copeland, A., *et al.* 2005a Direct Submission, National Centre for Biotechnology Information (NCBI).
22. Fouts, D.E., *et al.* 2005. Major structural differences and novel potential virulence mechanisms from the genomes of multiple *Campylobacter* species. *PLOS Biol.* 3: 030-040.
23. Nierman, W.C., *et al.* 2001. Complete genome sequence of *Caulobacter crescentus*. *Proc. Natl. Acad. Sci. USA.* 98: 4136-4141.
24. Read, T., *et al.* 2000. Genome sequences of *Chlamydia trachomatis* MoPn and *Chlamydia pneumoniae* AR39. *Nucleic Acids Res.* 28: 1397-1406.
25. Carlson, J.H., *et al.* 2005. Comparative genomic analysis of *Chlamydia trachomatis* oculotropic and genitotropic strains. *Infect Immun.* 73: 6407-6418.
26. Thomson, N.R., *et al.* 2004. The *Chlamydophila abortus* genome sequence reveals an array of variable proteins that contribute to interspecies variation. *Genome Res.* 15: 629-640.
27. Read, T., *et al.* 2003. The genome sequence of *Bacillus anthracis* Ames and comparison to closely related bacteria. *Nature* 423: 81-86.
28. Eisen, J.A., *et al.* 2002. The complete genome sequence of *Chlorobium tepidum* TLS, a photosynthetic, anaerobic, green-sulfur bacterium. *Proc. Natl. Acad. Sci. USA.* 99: 9509-14.
29. Vasconcelos, A.T.R., *et al.* 2003. The complete genome sequence of *Chromobacterium violaceum*, reveals remarkable and exploitable bacterial

- adaptability. *Proc. Natl. Acad. Sci. USA*. 100: 11660-11665.
30. Seshadri, R., *et al.* 2003. Complete genome sequence of the Q-fever pathogen *Coxiella burnetii*. *Proc. Natl. Acad. Sci. USA*. 100: 5455-5460.
  31. Copeland, A., *et al.* (2005b) Direct Submission, National Centre for Biotechnology Information (NCBI).
  32. Seshadri, R., *et al.* 2005. Genome sequence of the PCE-dechlorinating bacterium *Dehalococcoides ethenogenes*. *Science* 307: 105-108.
  33. Rabus, R., *et al.* 2004. The genome of *Desulfotalea psychrophila*, a sulfate-reducing bacterium from permanently cold arctic sediments. *Environ. Microbiol.* 6: 887-902.
  34. Heidelberg, J.F., *et al.* 2004. The genome sequence of the anaerobic, sulfate-reducing bacterium *Desulfovibrio vulgaris* Hildenborough. *Nat. Biotechnol.* 22: 554-559.
  35. Copeland, A., *et al.* 2005c. Direct Submission, National Centre for Biotechnology Information (NCBI).
  36. Collins, N.E., *et al.* 2005. The genome of the heartwater agent *Ehrlichia ruminantium* contains multiple tandem repeats of actively variable copy number. *Proc. Natl. Acad. Sci.* 102: 838-843.
  37. Bell, K.S., *et al.* 2004. Genome sequence of the enterobacterial phytopathogen *Erwinia carotovora* subsp. *atroseptica* and characterization of virulence factors. *Proc. Natl. Acad. Sci. USA*. 101: 11105-11110.
  38. Welch, R.A., *et al.* 2002. Extensive mosaic structure revealed by the complete genome sequence of uropathogenic *Escherichia coli*. *Proc. Natl. Acad. Sci. USA*.

- 99: 17020-17024.
39. Larsson, P., *et al.* 2005. The complete genome sequence of *Francisella tularensis*, the causative agent of tularemia. *Nat. Genet.* 37: 153-159.
  40. Kapatral, V., *et al.* 2002. Genome sequence and analysis of the oral bacterium *Fusobacterium nucleatum* strain ATCC 25586. *J. Bacteriol* 184: 2005-2018.
  41. Methe, B.A., *et al.* 2003. Genome of *Geobacter sulfurreducens*: metal reduction in subsurface environments. *Science* 302: 1967-1969.
  42. Nakamura, Y., *et al.* 2003. Complete genome structure of *Gloeobacter violaceus* PCC 7421, a cyanobacterium that lacks thylakoids (supplement). *DNA Res.* 10: 181-201.
  43. Prust, C., *et al.* 2005. Complete genome sequence of the acetic acid bacterium *Gluconobacter oxydans*. *Nat. Biotechnol.* 23: 195-200.
  44. Munson, R.S. Jr., *et al.* 2003. Direct Submission, National Centre for Biotechnology Information (NCBI).
  45. Harrison, A., *et al.* 2005. Genomic sequence of an otitis media isolate of nontypeable *Haemophilus influenzae*: comparative study with *H. influenzae* serotype d, strain KW20. *J. Bacteriol* 187: 4627-4636.
  46. Suerbaum, S., *et al.* 2003. The complete genome sequence of the carcinogenic bacterium *Helicobacter hepaticus*. *Proc. Natl. Acad. Sci. USA.* 100: 7901-7906.
  47. Tomb, J.-F., *et al.* 1997. The complete genome sequence of the gastric pathogen *Helicobacter pylori*. *Nature* 388: 539-547.
  48. Hou, S., *et al.* 2004. Genome sequence of the deep-sea {gamma}-proteobacterium *Idiomarina loihiensis* reveals amino acid fermentation as a source of carbon and

- energy. *Proc. Natl. Acad. Sci. USA*. 101: 18036-18041.
49. Cazalet, C., *et al.* 2004. Evidence in the *Legionella pneumophila* genome for exploitation of host cell functions and high genome plasticity. *Nat. Genet.* 36: 1165-1173.
  50. Nascimento, A.L., *et al.* 2004. Comparative genomics of two *Leptospira interrogans* serovars reveals novel insights into physiology and pathogenesis. *J. Bacteriol* 186: 2164-2172.
  51. Hong, S.H., *et al.* 2004. The genome sequence of the capnophilic rumen bacterium *Mannheimia succiniciproducens*. *Nat. Biotechnol.* 22: 1275-1281.
  52. Kaneko, T., *et al.* 2000. Complete genome structure of the nitrogen-fixing symbiotic bacterium *Mesorhizobium loti*. *DNA Res.* 7: 331-338.
  53. Lewis, L.A., *et al.* 2003. Direct Submission, National Centre for Biotechnology Information (NCBI).
  54. Parkhill, J., *et al.* 2000. Complete DNA sequence of a serogroup A strain of *Neisseria meningitidis* Z2491. *Nature* 404: 502-506.
  55. Starkenburg, S.R., *et al.* 2006. Genome sequence of the chemolithoautotrophic nitrite-oxidizing bacterium *Nitrobacter winogradskyi* Nb-255. *Appl. Environ. Microbiol.* 72: 2050-2063.
  56. Chain, P., *et al.* 2003. Complete genome sequence of the ammonia-oxidizing bacterium and obligate chemolithoautotroph *Nitrosomonas europaea*. *J. Bacteriol* 185: 2759-2773.
  57. Takami, H., *et al.* 2002. Genome sequence of *Oceanobacillus iheyensis* isolated from the Iheya Ridge and its unexpected adaptive capabilities to extreme

- environments. *Nucleic Acids Res.* 30: 3927-3935.
58. May, B.J., *et al.* 2001. Complete genomic sequence of *Pasteurella multocida*, Pm70. *Proc. Natl. Acad. Sci. USA.* 98: 3460-3465.
  59. Copeland, A., *et al.* 2005d. Direct Submission, National Centre for Biotechnology Information (NCBI).
  60. Copeland, A., *et al.* 2005e. Direct Submission, National Centre for Biotechnology Information (NCBI).
  61. Vezzi, A., *et al.* 2004. Direct Submission, National Centre for Biotechnology Information (NCBI).
  62. Nelson, K., *et al.* 2003. Complete genome sequence of the oral pathogenic bacterium *Porphyromonas gingivalis* strain W83. *J. Bacteriol* 185: 5591-5601.
  63. Medigue, C., *et al.* 2005. Coping with cold: the genome of the versatile marine Antarctica bacterium *Pseudoalteromonas haloplanktis* TAC125. *Genome Res.* 15: 1325-1335.
  64. Stover, C.K., *et al.* 2000. Complete genome sequence of *Pseudomonas aeruginosa* PA01, an opportunistic pathogen. *Nature.* 406: 959-964.
  65. Paulsen, I.T., *et al.* 2005. Complete genome sequence of the plant commensal *Pseudomonas fluorescens* Pf-5. *Nature Biotech.* 23: 873-878.
  66. Nelson, K., *et al.* 2002. Complete genome sequence and comparative analysis of the metabolically versatile *Pseudomonas putida* KT2440. *Environ. Microbiol.* 4: 799-808.
  67. Copeland, A., *et al.* 2005f. Direct Submission, National Centre for Biotechnology Information (NCBI).

68. Salanoubat, M., *et al.* 2002. Genome sequence of the plant pathogen *Ralstonia solanacearum*. *Nature*. 415: 497-502.
69. Copeland, A., *et al.* 2005g. Direct Submission, National Centre for Biotechnology Information (NCBI).
70. Glockner, F.O., *et al.* 2003 Complete genome sequence of the marine planctomycete *Pirellula* sp. strain 1. *Proc. Natl. Acad. Sci. U. S. A.* 100: 8298-303.
71. Larimer, F.W., *et al.* 2004. Complete genome sequence of the metabolically versatile photosynthetic bacterium *Rhodospseudomonas palustris*. *Nat. Biotechnol.* 22: 55-61.
72. Ogata, H., *et al.* 2001. Mechanisms of evolution in *Rickettsia conorii* and *R. prowazekii*. *Science*. 293: 2093-2098.
73. Ogata, H., *et al.* 2005. The genome sequence of *Rickettsia felis* identifies the first putative conjugative plasmid in an obligate intracellular parasite. *PLOS Biol.* 3: e248.
74. Andersson, S.G., *et al.* 1998. The genome sequence of *Rickettsia prowazekii* and the origin of mitochondria. *Nature*. 396: 133-140.
75. McLeod, M.P., *et al.* 2004. Complete genome sequence of *Rickettsia typhi* and comparison with sequences of other Rickettsiae. *J. Bacteriol* 186: 5842-5855.
76. Chiu, C.H., *et al.* 2005. The genome sequence of *Salmonella enterica* serovar Choleraesuis, a highly invasive and resistant zoonotic pathogen. *Nucleic Acids Res.* 33: 1690-1698.
77. McClelland, M., *et al.* 2001. Complete genome sequence of *Salmonella enterica*



- serovar Typhimurium LT2. *Nature*. 413: 852-856.
78. Heidelberg, J., *et al.* 2002. Genome sequence of the dissimilatory metal ion-reducing bacterium *Shewanella oneidensis*. *Nat. Biotechnol.* 20: 1118-1123.
  79. Wei, J., *et al.* 2003. Complete genome sequence and comparative genomics of *Shigella flexneri* serotype 2a strain 2457T. *Infect Immun.* 71: 2775-2786.
  80. Jiang, Y., *et al.* 2005. The complete sequence and analysis of the large virulence plasmid pSS of *Shigella sonnei*. *Plasmid.* 54: 149-159.
  81. Moran, M.A., *et al.* 2004. Genome sequence of *Silicibacter pomeroyi* reveals adaptations to the marine environment. *Nature*. 432: 910-913.
  82. Capela, D., *et al.* 2001. Analysis of the chromosome sequence of the legume symbiont *Sinorhizobium meliloti* strain 1021. *Proc. Natl. Acad. Sci. USA.* 98: 9877-9882.
  83. Ueda, K., *et al.* 2004. Genome sequence of *Symbiobacterium thermophilum*, an uncultivable bacterium that depends on microbial commensalism. *Nucleic Acids Res.* 32: 4937-4944.
  84. Copeland, A., *et al.* 2005h. Direct Submission, National Centre for Biotechnology Information (NCBI).
  85. Kaneko, T., *et al.* 1996. Sequence analysis of the genome of the unicellular cyanobacterium *Synechocystis* sp. strain PCC6803. II sequence determination of the entire genome and assignment of potential protein-coding regions. *DNA Res.* 3: 109-136.
  86. Bao, Q., *et al.* 2002. A complete sequence of the *T. tengcongensis* genome. *Genome Res.* 12: 689-700.

87. Nelson, K.E., *et al.* 1999. Evidence for lateral gene transfer between archaea and bacteria from genome sequence of *Thermotoga maritima*. *Nature* 399: 323-329.
88. Masui, R., *et al.* 2004. Complete genome sequence of *Thermus thermophilus* HB8. Direct Submission, National Centre for Biotechnology Information (NCBI).
89. Copeland, A., *et al.* 2005i. Direct Submission, National Centre for Biotechnology Information (NCBI).
90. Copeland, A., *et al.* 2005j. Direct Submission, National Centre for Biotechnology Information (NCBI).
91. Copeland, A., *et al.* 2005k. Direct Submission, National Centre for Biotechnology Information (NCBI).
92. Seshadri, R., *et al.* 2004. Comparison of the genome of the oral pathogen *Treponema denticola* with other spirochete genomes. *Proc. Natl. Acad. Sci. USA* 101: 5646-5651.
93. Fraser, C.M., *et al.* 1998. Complete genome sequence of *Treponema pallidum*, the syphilis spirochete. *Science* 281: 375-378.
94. Glass, J.I., *et al.* 2000. The complete sequence of the mucosal pathogen *Ureaplasma urealyticum*. *Nature* 407: 757-762.
95. Heidelberg, J.F., *et al.* 2004. DNA sequence of both chromosomes of the cholera pathogen *Vibrio cholerae*. *Nature* 406: 477-483.
96. Ruby, E.G., *et al.* 2005. Complete genome sequence of *Vibrio fischeri*: a symbiotic bacterium with pathogenic congeners. *Proc. Natl. Acad. Sci. USA*. 102: 3004-3009.
97. Makino, K., *et al.* 2003. Genome sequence of *Vibrio parahaemolyticus*: a

- pathogenic mechanism distinct from that of *V. cholerae*. *Lancet*. 361: 743-749.
98. Chen, C.Y., *et al.* 2003. Comparative genome analysis of *Vibrio vulnificus*, a marine pathogen. *Genome Res.* 13: 2577-2587.
  99. Akman, L., *et al.* 2002. Genome sequence of the endocellular obligate symbiont of tsetse flies, *Wigglesworthia glossinidia*. *Nature Genetics* 32: 402-407.
  100. Wu, M., *et al.* 2004. Phylogenomics of the reproductive parasite *Wolbachia pipientis* wMel: a streamlined genome overrun by mobile genetic elements. *PLOS Biol.* 2: E69.
  101. Baar, C., *et al.* 2003. Complete genome sequence and analysis of *Wolinella succinogenes*. *Proc. Natl. Acad. Sci. USA* 100: 11690-11695.
  102. da Silva, A.C.R., *et al.* 2002. Comparison of the genomes of two *Xanthomonas* pathogens with differing host specificities. *Nature* 417: 459-463.
  103. Qian, W., *et al.* 2005. Comparative and functional genomic analyses of the pathogenicity of phytopathogen *Xanthomonas campestris* pv. *campestris*. *Genome Res.* 15: 757-767.
  104. Lee, B.M., *et al.* 2005. The genome sequence of *Xanthomonas oryzae* pathovar *oryzae* KACC10331, the bacterial blight pathogen of rice. *Nucleic Acids Res.* 33: 577-586.
  105. Simpson, A.J.G., *et al.* 2001. The genome sequence of the plant pathogen *Xylella fastidiosa*. The *Xylella fastidiosa* consortium of the organization for nucleotide sequencing and analysis. *Nature* 406: 151-157.
  106. Parkhill, J., *et al.* 2001. Genome sequence of *Yersinia pestis*, the causative agent of plague. *Nature* 413: 523-527.

107. Chain, P.S., *et al.* 2004. Insights into the evolution of *Yersinia pestis* through whole-genome comparison with *Yersinia pseudotuberculosis*. *Proc. Natl. Acad. Sci. USA.* 101: 13826-13831.
108. Seo, J.S., *et al.* 2005. The genome sequence of the ethanologenic bacterium *Zymomonas mobilis* ZM4. *Nat. Biotechnol.* 23: 63-68.
109. Read, T.D., *et al.* 2003. The genome sequence of *Bacillus anthracis* Ames and comparison to closely related bacteria. *Nature* 423:81-86.
110. Ivanova, N., *et al.* 2003. Genome sequence of *Bacillus cereus* and comparative analysis with *Bacillus anthracis*. *Nature* 423: 87-91.
111. Takami, H., *et al.* 2000. Complete genome sequence of the alkaliphilic bacterium *Bacillus halodurans* and genomic sequence comparison with *Bacillus subtilis*. *Nucleic Acids Res.* 28: 4317-4331.
112. Veith, B., *et al.* 2004. The Complete Genome Sequence of *Bacillus licheniformis* DSM13, an Organism with Great Industrial Potential. *J. Mol. Microbiol. Biotechnol.* 7: 204-211.
113. Kunst, F., *et al.* 1997. The complete genome sequence of the gram-positive bacterium *Bacillus subtilis*. *Nature* 390: 249-256.
114. Brettin, T.S., *et al.* 2004. Complete genome sequence of *Bacillus thuringiensis* 97-27. Direct Submission, National Centre for Biotechnology Information (NCBI).
115. Schell, M.A., *et al.* 2002. The genome sequence of *Bifidobacterium longum* reflects its adaptation to the human gastrointestinal tract. *Proc. Natl. Acad. Sci. USA.* 99: 14422-14427.

116. Gil, R., *et al.* 2003. The genome sequence of *Blochmannia floridanus*: comparative analysis of reduced genomes. *Proc. Nat. Acad. Sci. USA* 100: 9388-9393.
117. Giovannoni, S.J., *et al.* 2005. Genome streamlining in a cosmopolitan oceanic bacterium. *Science* 309: 1242-1245.
118. Wu, M., *et al.* 2005. Life in hot carbon monoxide: the complete genome sequence of *Carboxydotherrmus hydrogenoformans* Z-29011. *PLoS Genet.* 1: e65.
119. Nolling, J., *et al.* 2001. Genome sequence and comparative analysis of the solvent-producing bacterium *Clostridium acetobutylicum*. *J. Bacteriol* 183: 4823-4838.
120. Myers, G.S., *et al.* 2006. Skewed genomic variability in strains of the toxigenic bacterial pathogen, *Clostridium perfringens*. *Genome Res.* 16: 1031-1040.
121. Bruggemann, H., *et al.* 2003. The genome sequence of *Clostridium tetani*, the causative agent of tetanus disease. *Proc. Natl. Acad. Sci. USA.* 100: 1316-1321.
122. Methe, B.A., *et al.* 2005. The psychrophilic lifestyle as revealed by the genome sequence of *Colwellia psychrerythraea* 34H through genomic and proteomic analyses. *Proc. Natl. Acad. Sci. USA.* 102: 10913-10918.
123. Cerdeno-Tarraga, A.M., *et al.* 2003. The complete genome sequence and analysis of *Corynebacterium diphtheriae* NCTC13129. *Nucleic Acids Res.* 31: 6516-6523.
124. Nishio, Y., *et al.* 2003. Comparative complete genome sequence analysis of the amino acid replacements responsible for the thermostability of *Corynebacterium efficiens*. *Genome Res.* 13: 1572-1579.
125. Nakagawa, S. 2002. Complete genomic sequence of *Corynebacterium*

- glutamicum* ATCC 13032. Direct Submission, National Centre for Biotechnology Information (NCBI).
126. Tauch, A., *et al.* 2005. Complete genome sequence and analysis of the multiresistant nosocomial pathogen *Corynebacterium jeikeium* K411, a lipid-requiring bacterium of the human skin flora. *J. Bacteriol* 187: 4671-4682.
  127. Kube, M., *et al.* 2005. Genome sequence of the chlorinated compound-respiring bacterium *Dehalococcoides* species strain CBDB1. *Nat. Biotechnol.* 23: 1269-1273.
  128. White, O., *et al.* 1999. Genome sequence of the radioresistant bacterium *Deinococcus radiodurans* R1. *Science* 286: 1571-1577.
  129. Paulsen, I., *et al.* 2003. Role of mobile DNA in the evolution of vancomycin-resistant *Enterococcus faecalis*. *Science* 299: 2071-2074.
  130. Takami, H., *et al.* 2004. Thermoadaptation trait revealed by the genome sequence of thermophilic *Geobacillus kaustophilus*. *Nucleic Acids Res.* 32: 6292-6303.
  131. Altermann, E., *et al.* 2005. Complete genome sequence of the probiotic lactic acid bacterium *Lactobacillus acidophilus* NCFM. *Proc. Natl. Acad. Sci. USA.* 102: 3906-3912.
  132. Pridmore, *et al.* 2004. The genome sequence of the probiotic intestinal bacterium *Lactobacillus johnsonii* NCC 533. *Proc. Natl. Acad. Sci. USA.* 101: 2512-2517.
  133. Kleerebezem, M., *et al.* 2004. Complete genome sequence of *Lactobacillus plantarum* WCFS1. *Proc. Natl. Acad. Sci. USA.* 100: 1990-1995.
  134. Makarova, K., *et al.* 2006. Comparative genomics of the lactic acid bacteria. *Proc. Natl. Acad. Sci. USA.* 103: 15611-6.

135. Vitorello, C.B.M., *et al.* 2004. The genome sequence of the gram-positive sugarcane pathogen *Leifsonia xyli* subsp. *xyli*. *Mol. Plant Microbe Interact.* 17: 827-836.
136. Glaser, P., *et al.* 2001. Comparative genomics of *Listeria* species. *Science* 294: 849-852.
137. Nelson, K.E., *et al.* 2004. Whole genome comparisons of serotype 4b and 1/2a strains of the food-borne pathogen *Listeria monocytogenes* reveal new insights into the core genome components of this species. *Nucleic Acids Res.* 32: 2386-2395.
138. Birren, B.W., *et al.* 2004. Direct Submission, National Centre for Biotechnology Information (NCBI).
139. Ward, N., *et al.* 2004. Genomic insights into methanotrophy: the complete genome sequence of *Methylococcus capsulatus* (Bath). *PLOS Biol.* 2: E303.
140. Li, L., *et al.* 2005. The complete genome sequence of *Mycobacterium avium* subspecies paratuberculosis. *Proc. Natl. Acad. Sci. USA.* 102: 12344-12349.
141. Garnier, T., *et al.* 2003. The complete genome sequence of *Mycobacterium bovis*. *Proc. Natl. Acad. Sci. USA.* 100: 7877-7882.
142. Cole, S.T., *et al.* 2001. Massive gene decay in the leprosy bacillus. *Nature* 409: 1007-1011.
143. Fleischmann, R.D., *et al.* 2002. Whole-genome comparison of *Mycobacterium tuberculosis* clinical and laboratory strains. *J. Bacteriol.* 184: 5479-5490.
144. Papazisi, L., *et al.* 2003. The complete genome sequence of the avian pathogen *Mycoplasma gallisepticum* strain R(low). *Microbiology* 149: 2307-2316.

145. Fraser, C.M., *et al.* 1995. The minimal genome complement of *Mycoplasma genitalium*. *Science* 270: 397-403.
146. Minion, F.C., *et al.* 2004. The genome sequence of *Mycoplasma hyopneumoniae* strain 232, the agent of swine mycoplasmosis. *J. Bacteriol* 186: 7123-7133.
147. Jaffe, J.D., *et al.* 2004. The complete genome and proteome of *Mycoplasma mobile*. *Genome Res.* 14: 1447-1461.
148. Westberg, J., *et al.* 2004. The genome sequence of *Mycoplasma mycoides* subsp. *mycoides* SC type strain PG1T, the causative agent of contagious bovine pleuropneumonia (CBPP). *Genome Res.* 14: 221-227.
149. Sasaki, Y., *et al.* 2002. The complete genomic sequence of *Mycoplasma penetrans*, an intracellular bacterial pathogen in humans. *Nucleic Acids Res.* 30: 5293-5300.
150. Dandekar, T., *et al.* 2000. Re-annotating the *Mycoplasma pneumoniae* genome sequence: adding value, function and reading frames. *Nucleic Acids Res.* 28: 3278-3288.
151. Chambaud, I., *et al.* 2001. The complete genome sequence of the murine respiratory pathogen *Mycoplasma pulmonis*. *Nucleic Acids Res.* 29: 2145-2153.
152. Vasconcelos, A.T., *et al.* 2005. Swine and poultry pathogens: the complete genome sequences of two strains of *Mycoplasma hyopneumoniae* and a strain of *Mycoplasma synoviae*. *J. Bacteriol.* 187: 5568-5577.
153. Copeland, A., *et al.* 2005. Direct Submission, National Centre for Biotechnology Information (NCBI).
154. Bruggemann, H., *et al.* 2004. The complete genome sequence of



- Propionibacterium acnes*, a commensal of human skin. *Science* 305: 671-673.
155. Ayala-del-Rio, H.L., *et al.* 2005. Complete sequence of *Psychrobacter arcticum* 273-4. Direct Submission, National Centre for Biotechnology Information (NCBI).
  156. Baba, T., *et al.* 2002. Genome and virulence determinants of high virulence community acquired MRSA. *Lancet*. 359: 1819-1827.
  157. Zhang, Y.Q., *et al.* 2003. Genome-based analysis of virulence genes in a non-biofilm-forming *Staphylococcus epidermidis* strain (ATCC 12228). *Mol. Microbiol.* 49: 1577-1593.
  158. Takeuchi, F., *et al.* 2005. Whole-genome sequencing of *Staphylococcus haemolyticus* uncovers the extreme plasticity of its genome and the evolution of human-colonizing staphylococcal specie. *J. Bacteriol.* 187: 7292-7308.
  159. Kuroda, M., *et al.* 2005. Whole genome sequence of *Staphylococcus saprophyticus* reveals the pathogenesis of uncomplicated urinary tract infection. *Proc. Natl. Acad. Sci. USA.* 102: 13272-13277.
  160. Tettelin, H., *et al.* 2002. Complete genome sequence and comparative genomic analysis of an emerging human pathogen, serotype V *Streptococcus agalactiae*. *Proc. Natl. Acad. Sci. USA.* 99: 12391-12396.
  161. Ajdic, D., *et al.* 2002. Genome sequence of *Streptococcus mutans* UA159, a cariogenic dental pathogen. *Proc. Natl. Acad. Sci. USA.* 99: 14434-14439.
  162. Hoskins, J.A., *et al.* 2001. Genome of the bacterium *Streptococcus pneumoniae* strain R6. *J. Bacteriol.* 183: 5709-5717.
  163. Ferretti, J.J., *et al.* 2001. Complete genome sequence of an M1 strain of

- Streptococcus pyogenes*. *Proc. Natl. Acad. Sci. USA*. 98: 4658-4663.
164. Bolotin, A., *et al.* 2004. Complete sequence and comparative genome analysis of the dairy bacterium *Streptococcus thermophilus*. *Nat. Biotechnol.* 22: 1554-1558.
  165. Ikeda, H., *et al.* 2003. Complete genome sequence and comparative analysis of the industrial microorganism *Streptomyces avermitilis*. *Nat. Biotechnol.* 21: 526-531.
  166. Bentley, S.D., *et al.* 2002. Complete genome sequence of the model actinomycete *Streptomyces coelicolor* A3(2). *Nature* 417: 141-147.
  167. Copeland, A., *et al.* 2005m. Direct Submission, National Centre for Biotechnology Information (NCBI).
  168. Nakamura, Y., *et al.* 2002. Complete genome structure of the thermophilic cyanobacterium *Thermosynechococcus elongatus* BP-1 DNA. *Res.* 9: 123-130.
  169. Bentley, S.D., *et al.* 2003. Sequencing and analysis of the genome of the Whipple's disease bacterium *Tropheryma whipplei*. *Lancet* 361: 637-644.
